# Supplementary material
Source: Springer Nature journal article supplement (https://www.springermedizin.de/resource/supplementary/40170_2013_18_MOESM13_ESM.pdf/25787602)

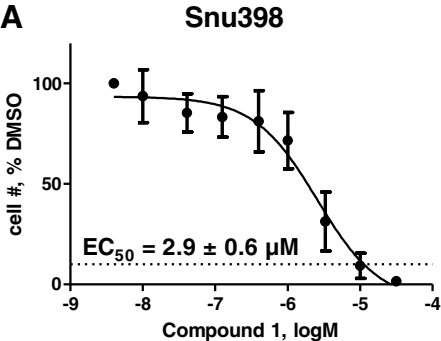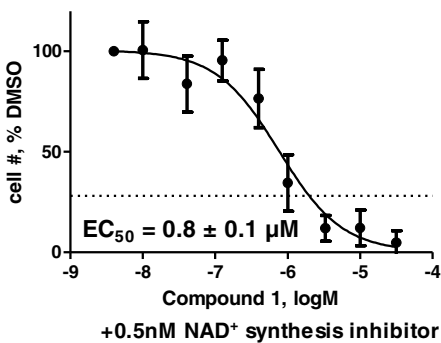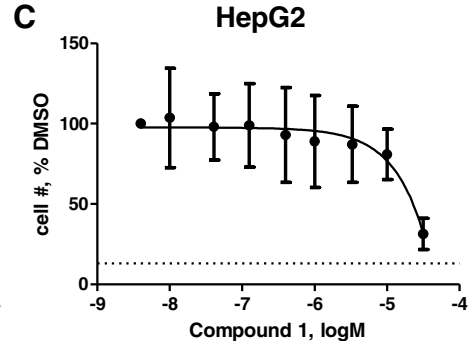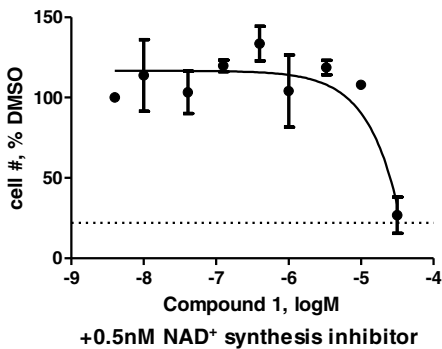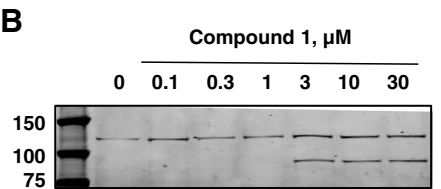

Supplement: MOESM13 [file 25787602]
